# Supplementary material for: The Variability of Relationship between Black Carbon and Carbon Monoxide over the Eastern Coast of China: BC Aging during Transport
Source: Copernicus journal article supplement (doi:10.5194/acp-2017-56), 2017-03-21
Supplement: Supplementary file [file acp-2017-56-AC2-supplement.pdf]

*Supplement of*

**The Variability of Relationship between Black Carbon  
and Carbon Monoxide over the Eastern Coast of China:  
BC Aging during Transport**

Qingfeng Guo et al.

*Correspondence to:* Min Hu (minhu@pku.edu.cn)

NOAA HYSPLIT MODEL  
 Forward trajectories starting at 0200 UTC 07 Apr 11  
 GHDA Meteorological Data

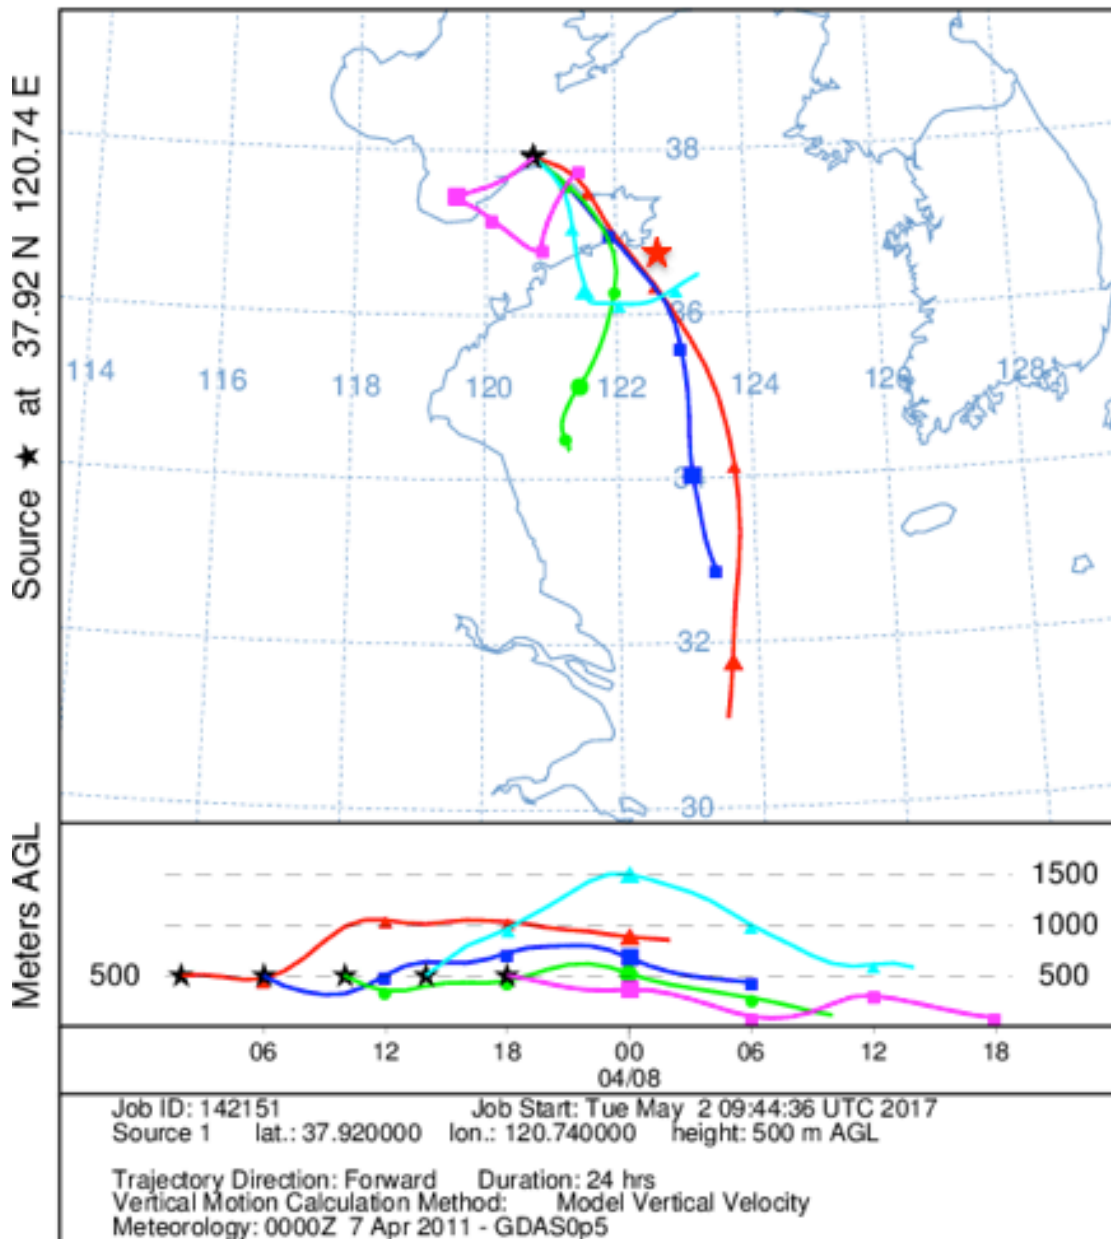

Fig. S1. The 24 hours forward trajectory starting at BC peak time of 18:00 (local time), April 7 for Changdao Island (the black star).

NOAA HYSPLIT MODEL  
 Backward trajectories ending at 0800 UTC 08 Apr 11  
 GHDA Meteorological Data

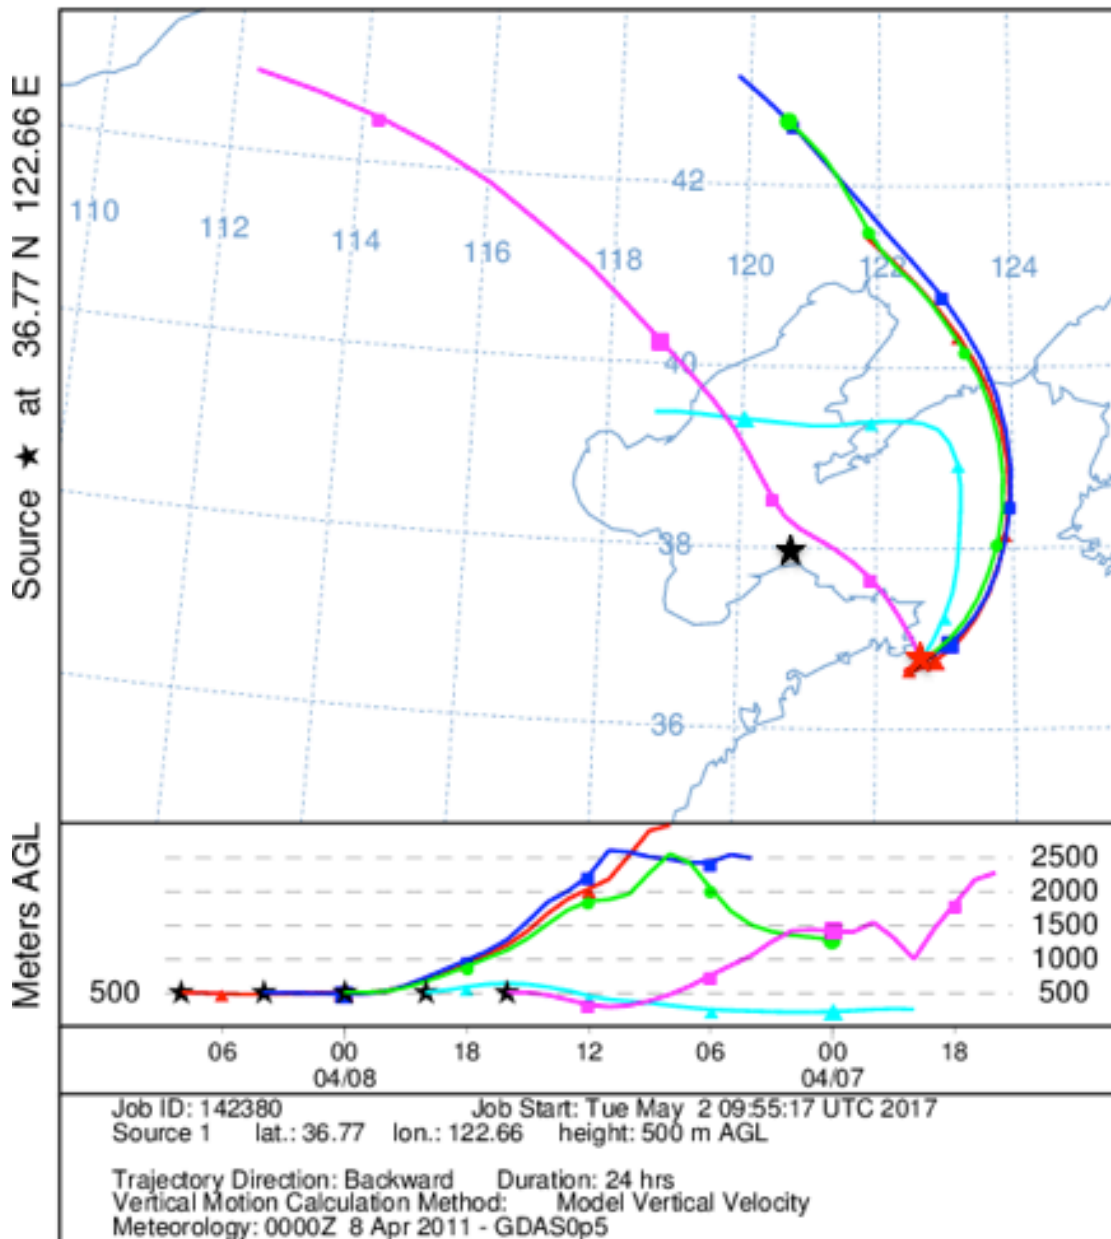

Fig. S2. The 24 hours backward trajectory starting at BC peak time of 08:00 (local time), April 8 for Yellow Sea (the red star).
